# Supplementary material for: Associations between Temperature and Influenza Activity: A National Time Series Study in China
Source: MDPI journal article supplement (doi:10.3390/ijerph182010846), 2021-10-15
Supplement: s1 [file s1]

(A) Spearman correlation analysis of monthly meteorological factors

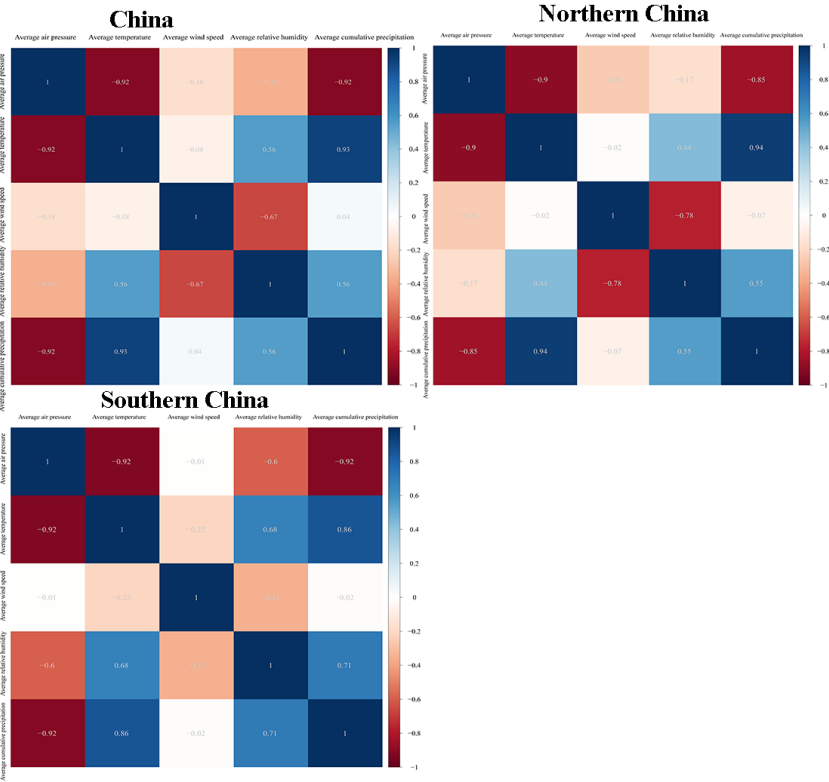

(B) Spearman correlation analysis of weekly meteorological factors

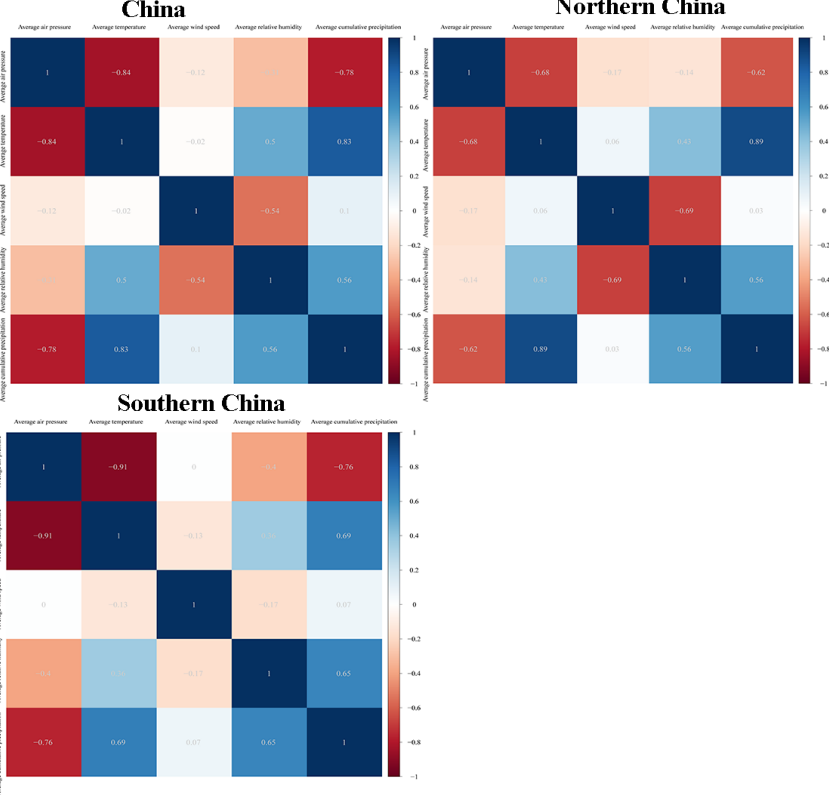

Supplementary Figure S1. The Spearman correlation analysis of meteorological factors

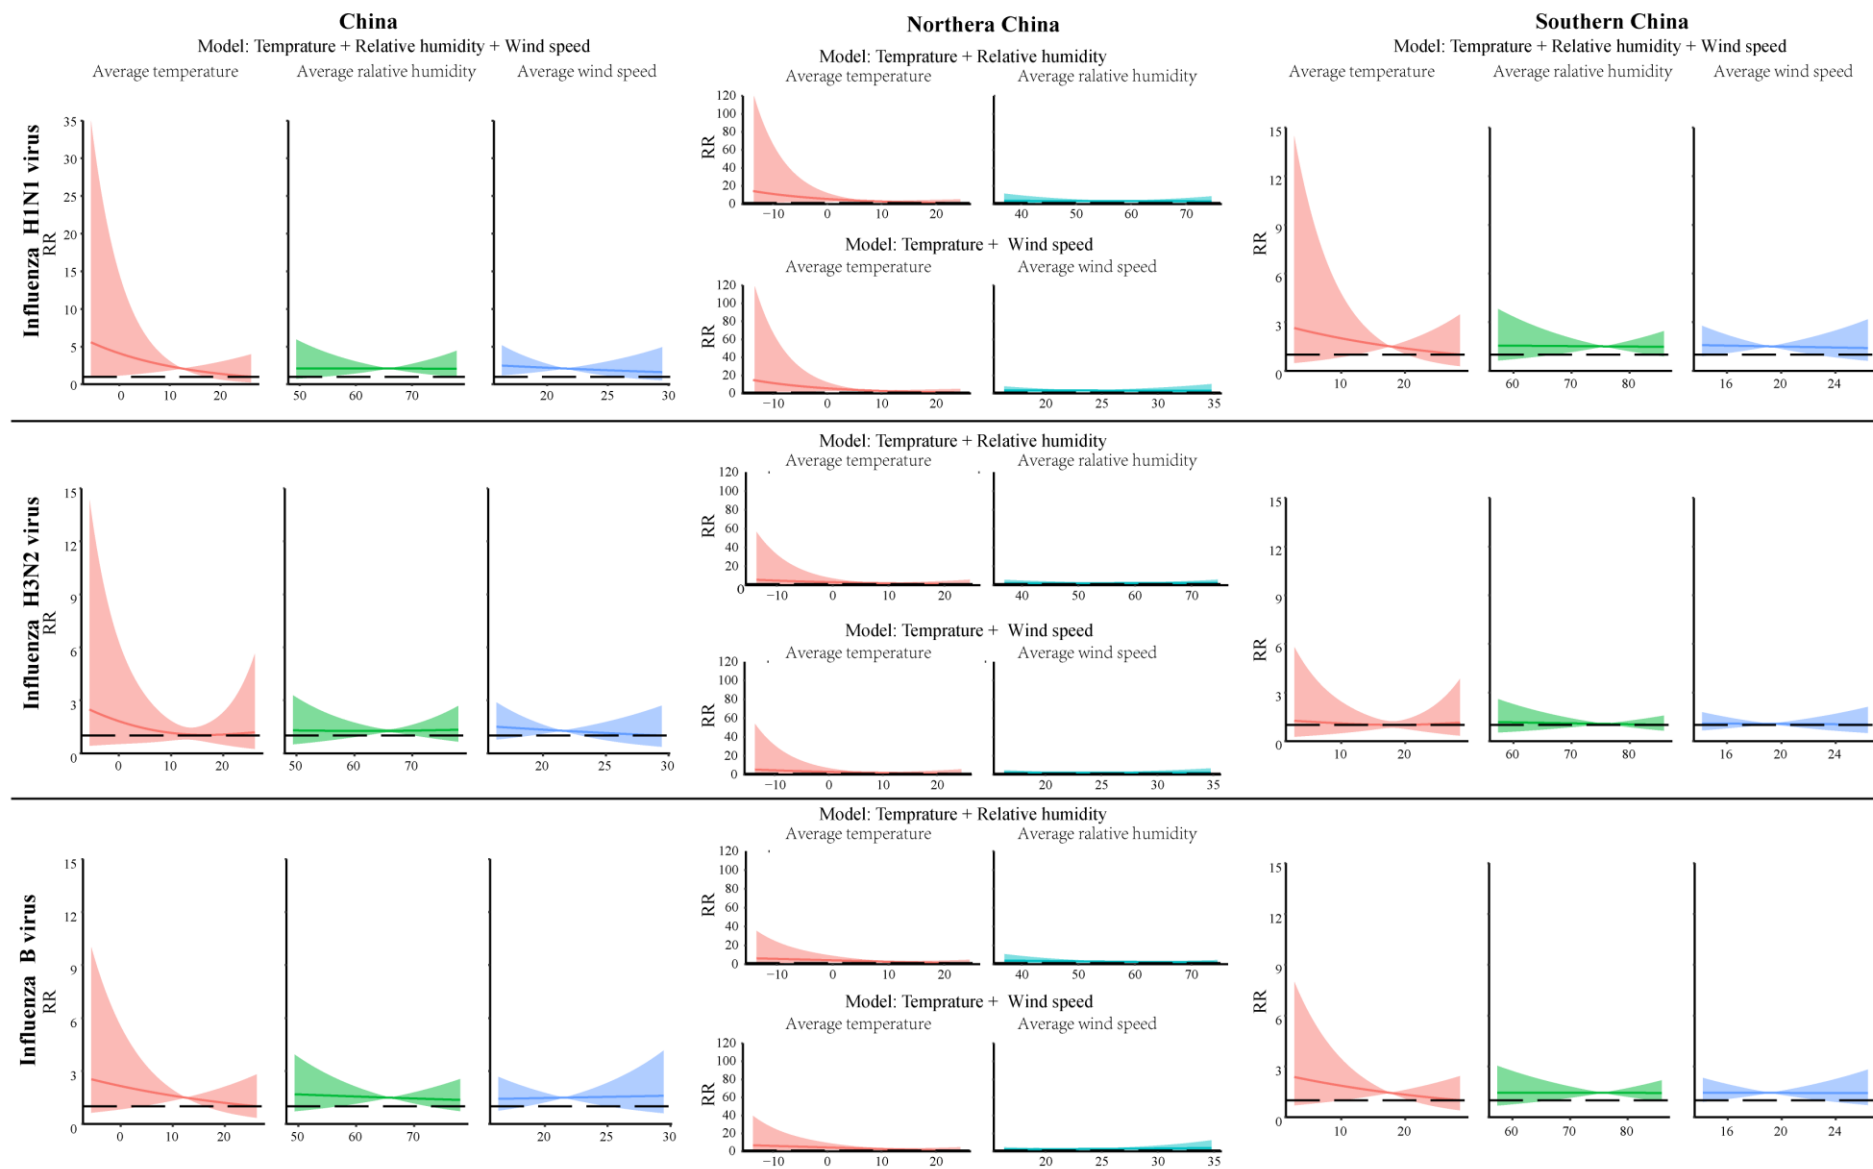

Supplementary Figure S2. The exposure-response of weekly AT to the positive rate of influenza virus
